# Supplementary material for: Diving into the Details: Constructing a Framework of Random Call Components
Source: Atypon-hosted journal article supplement (doi:10.1187/cbe.19-07-0130), 2020-05-01
Supplement: combinedsupmats.pdf [file combinedsupmats.pdf]

# **Supplemental Material**

*CBE—Life Sciences Education*

**Waugh and Andrews**

## Supplemental Materials

### **Diving into the details: Constructing a framework of random call components**

Alex H. Waugh & Tessa C. Andrews

#### **Interview protocol for focused study of instructor thinking about random call**

##### Notes about interview protocol:

- A. Italics represent introduction or framing.
- B. Bold, numbered items represent the main questions asked of each participant.
- C. Lettered questions below main questions are follow-up questions that were asked if the participant did not include this information in their original answer.

*We are interested in understanding more about how and why college biology faculty opt to use random call in large courses. We define **random call** as an instructor using a random approach to select a student or group of students to share their thinking with the whole class*

- 1. You mentioned in your e-mail that you \_\_\_\_\_. Tell me a little bit more about what that looks like in your classroom. Follow-up to ask WHY.**
  - a. Do you call on individuals or groups?
  - b. How do you make a random selection?
  - c. How often would you say you randomly call on students (or groups)?
  - d. When is the first time during the semester that you use random call?
  - e. Do you use random call every class?
  - f. Does your use of random call change over the course of a semester?
  - g. How do you talk to students about the use of random call in your course?
- 2. We are particularly interested in what motivates you to use random call. Talk to me about why you use random call.**
  - a. What do you see as the main benefits of random call as you use it?
  - b. What challenges have you faced in using random call?
  - c. What changes have you made in how you use random call over the years? Follow up: why did you make that change?
- 3. Some instructors worry about students feeling anxious when random call is used. How do you think about that?**
  - a. Do you think your students feel anxious? Does this change over the semester?
  - b. What steps do you take to minimize anxiety?
- 4. If you had to boil it down, what advice would you give to an instructor who wants to start using random call in a large course.**
